# Supplementary material
Source: Research Square preprint supplement (doi:10.21203/rs.3.rs-8936779/v1)
Supplement: Supplementary file 1 [file 10ae4da4715fa605c01e304f.docx]

**SUPPORT INFORMATION**

**Integration of Industry-Education-Research for Cross-Border Biomedical Engineering Graduate Education: Architecture Design, Local Adaptation, and Quality Assurance**

Xiaoying Guana*, Xing Jie Lianga*, Weisheng Guoa*

a The School of Biomedical Engineering, Guangzhou Medical University, Guangzhou 511436, China

* Corresponding authors.

Email addresses: [guanxiaoying@gzhmu.edu.cn](mailto:guanxiaoying@gzhmu.edu.cn) (X. Guan), [liangxj@nanoctr.cn](mailto:liangxj@nanoctr.cn) (X. Liang), [tjuguoweisheng@126.com](mailto:tjuguoweisheng@126.com) (W. Guo) .

**Table of Contents**

**Figure S[1.](#_Toc107640987)** [The workflow of Systematic Literature Review](#_Toc107640987) **[S2](#_Toc107640987)**

**[Table S1.](#_Toc107640988)** [The baseline characteristics of the two groups.](#_Toc107640988)**[.. S2](#_Toc107640988)**

**[Table S2.](#_Toc107640988)** [Faculty Competency Evaluation Form for Cross-Border BME Teaching](#_Toc107640988) **[S](#_Toc107640988)3**

**Table S[3.](#_Toc107640987)** [Faculty Competency Evaluation Form](#_Toc107640987)  **[S5](#_Toc107640987)**

**[Table S4.](#_Toc107640988)** [Graduate Employment Tracking Survey.](#_Toc107640988)**[.. S8](#_Toc107640988)**

**[Table S5.](#_Toc107640988)** [Evaluation Form for Cross-border Learning Effectiveness](#_Toc107640988) **[S](#_Toc107640988)10**

**[Table S6.](#_Toc107640992)** [Evaluation Form for Cross-border Industry-Education Integration Teaching Process](#_Toc107640992) **[S](#_Toc107640992)13**

**[Table S7.](#_Toc107640992)** [Evaluation Form for Teachers' Cross-border International Teaching and Industry- Education Integration Collaborative Capabilities](#_Toc107640992) **[. S](#_Toc107640992)16**

**[Table S8.](#_Toc107640993)** [Evaluation Form for the Effectiveness of Cross-border Industry-Education Integration Cooperation](#_Toc107640993) **[S](#_Toc107640993)20**

**[Table S9.](#_Toc107640988)** [Comprehensive Effect Evaluation Form of Cross-border Industry-Education Integration Teaching Practice System.](#_Toc107640988) **[S](#_Toc107640988)23**


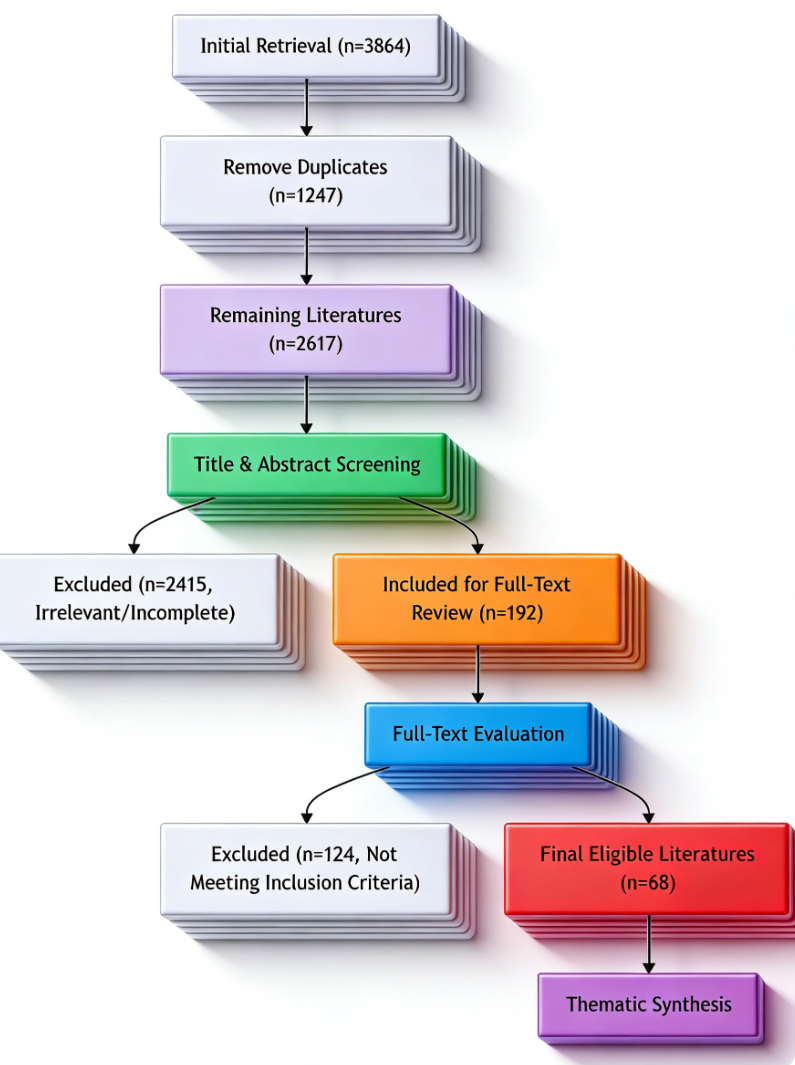
**Figure S1.** **The workflow of Systematic Literature Review.**

**Table S1. The baseline characteristics of the two groups**

| **Characteristic** | **Pilot Group** | **Control Group** | **p-value** |
| --- | --- | --- | --- |
| Age (years) | 25.3 ± 2.1 | 25.1 ± 2.3 | 0.65 |
| Gender | -- | -- | 0.78 |
| Undergraduate GPA | 3.2 ± 0.3 | 3.1 ± 0.4 | 0.53 |
| TOEFL Score | 85.2 ± 10.3 | 84.5 ± 11.2 | 0.76 |
| Pre-intervention CCAS-IS Score | 68.5 ± 5.1 | 67.8 ± 5.3 | 0.68 |

# **Table S2. Faculty Competency Evaluation Form for Cross-Border Biomedical Engineering (BME) Teaching**

**Evaluated Faculty** : __________ Course : __________ Semester : __________

**Evaluator** : □ Student □ Teaching Supervisor □ Industry Collaboration Expert Evaluation Date : __________

| **Primary Dimension** | **Weight** | **Secondary Indicator** | **Score (1-5)** | **Indicator Description** |
| --- | --- | --- | --- | --- |
| **I. Cross-Cultural Pedagogy Application Competence** | 50% | 1.1 English Instruction Proficiency |  | Delivers BME professional knowledge fluently in standard academic English, with terminology and sentence structures complying with international academic norms and no comprehension barriers for students. |
|  |  | 1.2 Cross-Cultural Teaching Design |  | Designs teaching content combined with international students’ cultural backgrounds and learning habits, adapting to the cognitive characteristics of students from different countries. |
|  |  | 1.3 Cross-Cultural Classroom Interaction |  | Proactively guides international students to participate in classroom discussions, effectively resolves communication barriers caused by cultural differences, and creates an inclusive classroom atmosphere. |
|  |  | 1.4 Cross-Cultural Academic Guidance |  | Provides targeted tutoring and solutions for international students facing cross-cultural problems in professional learning and academic writing. |
|  |  | 1.5 Application of Diverse Teaching Methods |  | Flexibly adopts diverse methods such as PBL and case-based teaching, integrates cross-border BME cases, and aligns with international education and teaching models. |
| **II. Industry-Education-Research (IER) Integration Teaching Competence** | 50% | 2.1 Integration of Industry Knowledge into Teaching |  | Profusely integrates cutting-edge BME industry technologies and global industrial norms into classroom teaching, connecting with international industrial demands. |
|  |  | 2.2 Practical Teaching Design Competence |  | Designs practical teaching content that fits cross-border industrial scenarios, guiding students to apply professional knowledge to practical engineering problems. |
|  |  | 2.3 IER Collaboration Connection |  | Links university-enterprise/international cooperation resources, provides international students with cross-border IER practical opportunities, and guides the implementation of practical projects. |
|  |  | 2.4 Transformation of Research Achievements into Teaching Resources |  | Converts personal research achievements and cross-border collaborative research content into teaching resources, enhancing students’ research and innovation awareness. |
|  |  | 2.5 Industry Skill-Oriented Training |  | Fosters students’ professional practical and application abilities that meet global industry standards, centering on the international vocational skill requirements of BME. |
| **Dimension Scores** | —— | Cross-Cultural Pedagogy Application Competence (Full 50): ______Industry-Education-Research Integration Teaching Competence (Full 50): ______ | —— | Calculation: Average score of secondary indicators × corresponding weight |
| **Comprehensive Score** | —— | (Full 100): ______ **Comprehensive Rating** : __________ | —— | —— |
| **Comments and Suggestions** | —— | (Specific suggestions on the improvement of cross-cultural teaching and IER integration teaching are welcome): | —— | —— |

**Evaluation Instructions** : Rated on a 5-point Likert Scale (1=Strongly Disagree, 2=Disagree, 3=Neutral, 4=Agree, 5=Strongly Agree). The full score is 100 points, with scores calculated by weighting each dimension. Grading criteria: <60 = Unqualified, 60~79 = Qualified, 80~89 = Good, ≥90 = Excellent.

# Table S3. Faculty Competency Evaluation Form

**Evaluated Faculty : __________ Course Taught (BME) : __________ Semester/Academic Year : __________**

**Evaluator Type : □ International Student □ Teaching Supervisor □ IER Collaboration Expert Evaluation Date : __________**

**Evaluation Guidelines :** Rated on a 5-point Likert Scale (1=Strongly Disagree, 2=Disagree, 3=Neutral, 4=Agree, 5=Strongly Agree). Total score is calculated by averaging all indicator scores; higher scores represent stronger competency.

| **Core Evaluation Domain** | **Weight** | **Evaluation Indicators** | **Score (1-5)** | **Brief Description** |
| --- | --- | --- | --- | --- |
| **1. Cross-Cultural Pedagogy Competence** | 50% | 1.1 Academic English teaching proficiency |  | Fluent in academic English for BME professional teaching; accurate terminology and clear expression |
|  |  | 1.2 Cross-cultural teaching content design |  | Adapts teaching content to international students’ cultural backgrounds and learning characteristics |
|  |  | 1.3 Inclusive classroom interaction guidance |  | Effectively motivates international students’ participation; resolves cross-cultural communication barriers |
|  |  | 1.4 Targeted cross-cultural academic guidance |  | Provides tailored support for international students’ study difficulties and academic writing |
|  |  | 1.5 Integration of cross-border BME teaching cases |  | Incorporates international BME industry/clinical cases into teaching to align with global standards |
| **2. Industry-Education-Research (IER) Integration Teaching Competence** | 50% | 2.1 Integration of BME industry frontier knowledge |  | Combines cutting-edge BME technologies and industrial norms with classroom teaching content |
|  |  | 2.2 Design of IER-oriented practical teaching |  | Develops practical teaching tasks linked to BME industrial application scenarios |
|  |  | 2.3 Guidance on cross-border IER practice projects |  | Directs students in BME practical projects with university-enterprise/international collaboration resources |
|  |  | 2.4 Transformation of research achievements into teaching |  | Converts BME research findings into teaching resources to enhance students’ innovative thinking |
|  |  | 2.5 Cultivation of industry-aligned BME professional skills |  | Teaches professional skills meeting international BME industry employment requirements |
| **Subtotal for Domains** | —— | Cross-Cultural Pedagogy (Avg Score): ______IER Integration Teaching (Avg Score): ______ | —— | —— |
| **Overall Competency Score** | —— | (Total Avg Score, 1-5): ______ | —— | —— |
| **Qualitative Comments & Suggestions** | —— | Comments on faculty’s strengths, improvement areas, and targeted suggestions for cross-border BME teaching: | —— | —— |
| **Sign-off** | —— | Evaluator’s Signature: __________Teaching Admin Review Signature (if applicable): __________ | —— | —— |
| **Notes** | —— | This form is dedicated to evaluating faculty’s teaching competency for international BME postgraduate students in cross-border education programs. Indicators may be adjusted per actual teaching needs. | —— | —— |

# Table S4. **Graduate Employment Tracking Survey**

****Survey Target**** : BME International Graduates (6 months post-graduation)****Graduation Cohort**** : __________

****Survey Method**** : Questionnaire + Phone Interview

## ****Survey Date**** : __________ ****Interviewer**** : __________ ****Response Status**** : □ Completed □ Unreachable □ Refused

## Basic Information of Graduates

| **Item** | **Content** |
| --- | --- |
| Full Name (Pinyin/English) | __________ |
| Nationality/Region | __________ |
| Major Direction (BME) | □ Biomedical Instrumentation □ Biomaterials & Tissue Engineering □ Clinical Engineering □ Medical Image Processing □ Other: __________ |
| Degree Obtained | □ Master □ PhD |

# Core Employment Information (Focus on Cross-Border Outcomes)

| **Evaluation Dimension** | **Specific Indicator** | **Options / Filled Content** |
| --- | --- | --- |
| **1. Employment Status** | 1.1 Current employment status | □ Employed (Formal/Full-time) □ Pursuing further study (PhD/Postdoc) □ Unemployed (Seeking jobs) □ Self-employed □ Other: __________ |
|  | 1.2 Time to secure first job | □ ≤3 months □ 3-6 months □ >6 months □ N/A |
| **2. Employment Sector (for employed graduates)** | 2.1 Industry type | □ Biomedical Engineering Enterprise □ Medical Institution (Clinical Engineering) □ Research Institute □ Education Institution □ Government/Regulatory Department □ Other: __________ |
|  | 2.2 Enterprise scale/nature | □ Multinational BME Enterprise □ Chinese-funded Enterprise (Cross-border Business) □ Local Enterprise (Domestic Business Only) □ Non-profit Organization □ Other: __________ |
| **3. Cross-Border Employment Attributes (core focus)** | 3.1 Job location | □ China (Mainland) □ Graduate’s Home Country/Region □ Third Country/Region □ N/A |
|  | 3.2 Cross-border work content | □ Yes (e.g., cross-border R&D/Regulatory Affairs/Technical Sales/International Cooperation) □ No (domestic business only) □ N/A |
|  | 3.3 Employment type linked to cross-border education | □ Directly linked (BME professional skills + cross-cultural competence applied) □ Indirectly linked □ Unrelated □ N/A |
| **4. Job Matching & Professional Development** | 4.1 Match between major and job | □ Highly matched □ Basically matched □ Slightly matched □ Unmatched |
|  | 4.2 Professional title/position level | __________ |
|  | 4.3 Main job responsibilities (BME-related) | __________ |
| **5. Salary & Career Expectation** | 5.1 Monthly/Annual salary (before tax, local currency) | __________ |
|  | 5.2 Career development plan in 3-5 years | □ Engage in cross-border BME work long-term □ Transfer to domestic business □ Further study/research □ Other: __________ |

# ****Survey Completion Confirmation**** : All information is filled truthfully □ Signature (Graduate) / Verbal confirmation record : __________

# ****Data Reviewer**** : __________ ****Data Filing Date**** : __________

# ****Notes**** : This survey is for tracking the employment outcomes of BME international graduates, with a core focus on cross-border employment-related attributes; all collected data is used for academic research only and kept confidential.

# Table S5. Evaluation Form for Cross-border Learning Effectiveness of International Postgraduates in Biomedical Engineering (Student Self-assessment + Supervisor Evaluation)

****Evaluated Student**** : __________ Student ID: __________ Cross-border Learning Program/Institution: __________ Evaluation Semester/Stage: __________

****Evaluation Instructions**** :

1. This form includes 15 evaluation indicators covering three dimensions: professional knowledge, competencies and literacy, with three newly added core indicators: Cross-border Practical Competence, Mastery of International Regulatory Standards and Cross-cultural Medical Communication Competence;

2. Scoring is based on a 100-point scale, with student self-assessment accounting for 30% and supervisor evaluation for 70%. ****Final Score = Self-assessment Score × 0.3 + Supervisor Evaluation Score × 0.7****;

3. Cronbach’s α coefficient = 0.89, indicating good scale reliability;

4. Scoring Criteria: 90-100 (Excellent, Fully Achieved), 80-89 (Good, Well Achieved), 70-79 (Satisfactory, Basically Achieved), 60-69 (Pass, Initially Achieved), 0-59 (Fail, Not Achieved);

5. The remarks column can be filled with supplementary information such as specific performance and improvement suggestions.

| **No.** | **Evaluation Dimension** | **Evaluation Indicator** | **Student Self-assessment (30%) Score (0-100)** | **Supervisor Evaluation (70%) Score (0-100)** | **Remarks (Specific Performance/**  **Improvement Suggestions)** |
| --- | --- | --- | --- | --- | --- |
| 1 | Professional Knowledge Mastery | Application ability of core professional knowledge in biomedical engineering |  |  |  |
| 2 | Professional Knowledge Mastery | Ability to understand and track international cutting-edge research achievements |  |  |  |
| 3 | Professional Knowledge Mastery | Mastery of international regulatory standards (Newly Added) |  |  |  |
| 4 | Cross-border Practical Competence | Cross-border practical competence (Newly Added) |  |  |  |
| 5 | Cross-border Practical Competence | Participation and practical ability in overseas scientific research projects |  |  |  |
| 6 | Cross-border Practical Competence | Cross-border collaborative ability in biomedical engineering experiments/design |  |  |  |
| 7 | Cross-cultural Communication Literacy | Cross-cultural medical communication competence (Newly Added) |  |  |  |
| 8 | Cross-cultural Communication Literacy | Oral expression and communication ability in professional English |  |  |  |
| 9 | Cross-cultural Communication Literacy | Writing and presentation ability of professional English literatures |  |  |  |
| 10 | Cross-cultural Communication Literacy | Cross-cultural team collaboration and conflict resolution ability |  |  |  |
| 11 | Independent Learning and Research | Ability to plan and implement cross-border independent learning |  |  |  |
| 12 | Independent Learning and Research | Ability to explore and solve cross-border academic problems |  |  |  |
| 13 | Professional Literacy and Adaptability | Adaptability to overseas study and life |  |  |  |
| 14 | Professional Literacy and Adaptability | Compliance with international academic norms and professional ethics |  |  |  |
| 15 | Comprehensive Development | Ability to transform and innovatively apply cross-border learning achievements |  |  |  |
| - | ****Score Summary**** | Total Self-assessment Score (Average of all indicators) |  | - |  |
| - | ****Score Summary**** | Total Supervisor Evaluation Score (Average of all indicators) | - |  |  |
| - | ****Score Summary**** | Final Comprehensive Score (Self-assessment×0.3+Supervisor×0.7) | ---------- | ---------- |  |
| - | ****Evaluation Grade**** | (Excellent/Good/Satisfactory/Pass/Fail) | ---------- | ---------- |  |
| - | ****Overall Comments**** | Student's Self-assessment Comments:Signature: __________ Date: __________ |  | Supervisor's Evaluation Comments:Signature: __________ Date: __________ |  |

**Table S6. Evaluation Form for Cross-border Industry-Education Integration Teaching Process (Postgraduate Anonymous Evaluation)**

**Evaluated Object**: Cross-border Industry-Education Integration Course/Teaching Team

**Evaluator**: Postgraduate (Anonymous)

**Cross-border Learning Program/Institution**: __________

**Evaluation Semester/Course Cycle**: __________

**Evaluation Instructions**:

1. This form includes 12 evaluation indicators, covering four dimensions: teaching design, teaching implementation, cross-border resource integration, and teaching effectiveness, with three newly added core indicators: "Cross-cultural Teaching Effectiveness", "Integration Degree of International Standards" and "Utilization Effect of Cross-border Resources";
2. Scoring adopts a 100-point scale, each indicator is scored independently, and the final score is the average of the scores of all indicators;
3. Cronbach's α coefficient = 0.87, indicating good scale reliability;
4. Scoring Criteria: 90-100 points (Excellent, Fully Meet Expectations), 80-89 points (Good, Well Meet Expectations), 70-79 points (Satisfactory, Basically Meet Expectations), 60-69 points (Pass, Initially Meet Expectations), 0-59 points (Fail, Fail to Meet Expectations);
5. The remarks column can be filled with supplementary information such as specific teaching performance, typical cases, and improvement suggestions; 6. To ensure the objectivity and authenticity of the evaluation, this evaluation is conducted anonymously, and the evaluation results will be an important basis for teaching optimization and team assessment.

| **No.** | **Evaluation Dimension** | **Evaluation Indicator** | **Score (0-100 Points)** | **Remarks (Specific Performance/Typical Cases/Improvement Suggestions)** |
| --- | --- | --- | --- | --- |
| 1 | Teaching Objectives and Design | Clarity and Rationality of Cross-border Industry-Education Integration Teaching Objectives | __________ | __________ |
| 2 | Teaching Objectives and Design | Matching Degree of Course Content with Cross-border Industry Needs | __________ | __________ |
| 3 | Teaching Objectives and Design | **Integration Degree of International Standards** (Newly Added) | __________ | __________ |
| 4 | Teaching Implementation Process | Coherence of Teaching Logic and Comprehensibility of Explanation | __________ | __________ |
| 5 | Teaching Implementation Process | Design and Effect of Cross-border Interactive Teaching Sessions | __________ | __________ |
| 6 | Teaching Implementation Process | Rationality and Operability of Industry-Education Integration Practical Tasks | __________ | __________ |
| 7 | Cross-border Resource Integration | **Utilization Effect of Cross-border Resources** (Newly Added) | __________ | __________ |
| 8 | Cross-border Resource Integration | Docking and Application Effectiveness of Overseas Enterprise/Research Institution Resources | __________ | __________ |
| 9 | Cross-border Resource Integration | Practicality of Cross-border Teaching Platforms and Digital Resources | __________ | __________ |
| 10 | Teaching Effectiveness | **Cross-cultural Teaching Effectiveness** (Newly Added) | __________ | __________ |
| 11 | Teaching Effectiveness | Improvement Effect of Professional Knowledge and Cross-border Industry Practical Ability | __________ | __________ |
| 12 | Teaching Effectiveness | Supporting Role for Subsequent Cross-border Learning/Professional Development | __________ | __________ |
| Total | | Sum of Scores of All Indicators | __________ | - |
| Final Score | | (Total Score ÷ 12) | __________ | - |
| Evaluation Grade | | (Excellent/Good/Satisfactory/Pass/Fail) | __________ | - |
| Overall Suggestions | | __________ | | |

**Note**: Please complete the evaluation truthfully and objectively. Your feedback is crucial for improving teaching quality. After completing the evaluation, please submit it to the designated collection channel. Thank you for your cooperation!

**Table S7**. **Evaluation Form for Teachers' Cross-border International Teaching and Industry-Education Integration Collaborative Capabilities (Student + Peer + International Enterprise/Foreign Expert Evaluation)**

**Evaluated Object**: __________ (Teacher's Name) Department/College: __________ Cross-border Teaching Program/Cooperative Institution: __________

**Evaluator**: Student □ Peer □ International Enterprise/Foreign Expert □

**Evaluation Cycle**: __________ (Semester/Academic Year/Project Cycle)

**Evaluation Instructions**:

1. This form includes 14 evaluation indicators, covering three dimensions: cross-border teaching capabilities, industry-education integration collaborative capabilities, and cross-cultural literacy, with three newly added core indicators: "Cross-border Curriculum Design Capability", "International Standard Interpretation Capability" and "Cross-cultural Classroom Management Capability";
2. Scoring adopts a 100-point scale, with evaluation weights: student evaluation accounts for 40%, peer evaluation for 30%, and international enterprise/foreign expert evaluation for 30%. Final Comprehensive Score = Student Evaluation Score × 0.4 + Peer Evaluation Score × 0.3 + International Enterprise/Foreign Expert Evaluation Score × 0.3;
3. Cronbach's α coefficient = 0.91, indicating excellent scale reliability;
4. Scoring Criteria: 90-100 points (Excellent, Outstanding Capability), 80-89 points (Good, Strong Capability), 70-79 points (Satisfactory, Qualified Capability), 60-69 points (Pass, Basically Qualified Capability), 0-59 points (Fail, Unqualified Capability);
5. The remarks column can be filled with supplementary information such as specific capability performance, typical cases, and improvement suggestions;
6. All evaluators shall complete the evaluation objectively and impartially, and the evaluation results will serve as an important basis for teacher training and performance assessment.

| **No.** | **Evaluation Dimension** | **Evaluation Indicator** | **Student Evaluation (40%) Score (0-100)** | **Peer Evaluation (30%) Score (0-100)** | **International Enterprise/Foreign Expert Evaluation (30%) Score (0-100)** | **Remarks (Specific Performance/Improvement Suggestions)** |
| --- | --- | --- | --- | --- | --- | --- |
| 1 | Cross-border Teaching Capabilities | **Cross-border Curriculum Design Capability** (Newly Added) | __________ | __________ | __________ | __________ |
| 2 | Cross-border Teaching Capabilities | Cross-border Bilingual/Full English Teaching Implementation Capability | __________ | __________ | __________ | __________ |
| 3 | Cross-border Teaching Capabilities | Design and Guidance Capability of Cross-border Teaching Interactive Sessions | __________ | __________ | __________ | __________ |
| 4 | Cross-border Teaching Capabilities | **Cross-cultural Classroom Management Capability** (Newly Added) | __________ | __________ | __________ | __________ |
| 5 | Cross-border Teaching Capabilities | Cross-border Teaching Effect Evaluation and Feedback Improvement Capability | __________ | __________ | __________ | __________ |
| 6 | Industry-Education Integration Collaborative Capabilities | **International Standard Interpretation Capability** (Newly Added) | __________ | __________ | __________ | __________ |
| 7 | Industry-Education Integration Collaborative Capabilities | Integration Capability of Cross-border Industry Needs and Teaching Content | __________ | __________ | __________ | __________ |
| 8 | Industry-Education Integration Collaborative Capabilities | Planning and Organization Capability of Cross-border Industry-Education Integration Practical Projects | __________ | __________ | __________ | __________ |
| 9 | Industry-Education Integration Collaborative Capabilities | Docking and Cooperation Capability with International Enterprise/Research Institution Resources | __________ | __________ | __________ | __________ |
| 10 | Cross-cultural Literacy | Cross-cultural Communication and Exchange Capability | __________ | __________ | __________ | __________ |
| 11 | Cross-cultural Literacy | Practice Capability of International Academic Norms and Professional Ethics | __________ | __________ | __________ | __________ |
| 12 | Comprehensive Capabilities | Cross-border Teaching Innovation and Research Capability | __________ | __________ | __________ | __________ |
| 13 | Comprehensive Capabilities | Cross-border Teacher Team Collaboration Capability | __________ | __________ | __________ | __________ |
| 14 | Comprehensive Capabilities | Problem-solving and Emergency Handling Capability Related to Cross-border Teaching | __________ | __________ | __________ | __________ |
| Score Summary | | Total Student Evaluation Score (Average of All Indicators) | __________ | - | - | - |
| Score Summary | | Total Peer Evaluation Score (Average of All Indicators) | - | __________ | - | - |
| Score Summary | | Total International Enterprise/Foreign Expert Evaluation Score (Average of All Indicators) | - | - | __________ | - |
| Score Summary | | Final Comprehensive Score | __________ (Student × 0.4 + Peer × 0.3 + Enterprise/Expert × 0.3) | | | - |
| Evaluation Grade | | (Excellent/Good/Satisfactory/Pass/Fail) | __________ | | | - |
| Overall Comments | | __________ | | | | |
| Evaluator's Signature | | Student's Signature: __________ Date: __________ | Peer：__________ Date: __________ | International Enterprise/Foreign Expert：__________ Date: __________ | - | |

**Table S8**. **Evaluation Form for the Effectiveness of Cross-border Industry-Education Integration Cooperation (Mutual Evaluation among Chinese Universities, Overseas Research Institutions, and International Enterprises)**

**Evaluating Party**: __________ (Name of Chinese University/Overseas Research Institution/International Enterprise) Type of Evaluating Party: __________ (Please tick: Chinese University □ Overseas Research Institution □ International Enterprise □)

**Evaluated Party**: __________ (Name of Chinese University/Overseas Research Institution/International Enterprise) Name of Cooperation Project: __________

**Cooperation Period**: __________ (Start Date - End Date) Evaluation Date: __________

**Evaluation Instructions**:

1. This form includes 11 evaluation indicators, covering four dimensions: cross-border resource integration, cooperation project implementation, talent training effectiveness, and cooperation sustainability, with 3 newly added core indicators: "Cross-border Resource Sharing Effect", "Cross-border Case Development Quality", and "Cross-border Practical Training Effectiveness";
2. Scoring adopts a 100-point scale, with scoring criteria: 90-100 points (Excellent, Significant Effectiveness), 80-89 points (Good, Good Effectiveness), 70-79 points (Satisfactory, Qualified Effectiveness), 60-69 points (Pass, Basically Qualified Effectiveness), 0-59 points (Fail, Unqualified Effectiveness);
3. Cronbach's α coefficient = 0.85, indicating good scale reliability;
4. The remarks column can be filled with supplementary information such as specific effectiveness performance, typical cases, and improvement suggestions;
5. The evaluating party shall complete the evaluation objectively and impartially, and the evaluation results will serve as an important basis for the deepening of subsequent cooperation and resource allocation;
6. This is a mutual evaluation form, and each cooperation subject shall separately evaluate the cooperation effectiveness of other cooperation parties.

| **No.** | **Evaluation Dimension** | **Evaluation Indicator** | **Score (0-100 Points)** | **Remarks (Specific Effectiveness/Typical Cases/Improvement Suggestions)** |
| --- | --- | --- | --- | --- |
| 1 | Cross-border Resource Integration | **Cross-border Resource Sharing Effect** (Newly Added) | __________ | __________ |
| 2 | Cross-border Resource Integration | Effectiveness of Cross-border Exchange and Collaboration among Teachers/Researchers | __________ | __________ |
| 3 | Cross-border Resource Integration | Sharing Utilization Rate of Cross-border Teaching/Research Facilities and Equipment | __________ | __________ |
| 4 | Cooperation Project Implementation | **Cross-border Case Development Quality** (Newly Added) | __________ | __________ |
| 5 | Cooperation Project Implementation | Completion Degree and Quality of Cooperation Project Plan | __________ | __________ |
| 6 | Cooperation Project Implementation | Efficiency and Smoothness of Cross-border Cooperation Communication and Coordination | __________ | __________ |
| 7 | Talent Training Effectiveness | **Cross-border Practical Training Effectiveness** (Newly Added) | __________ | __________ |
| 8 | Talent Training Effectiveness | Cross-border Employment/Research Adaptability of Cooperatively Trained Talents | __________ | __________ |
| 9 | Talent Training Effectiveness | Effect of Improving Students'/Trainees' Cross-border Comprehensive Capabilities | __________ | __________ |
| 10 | Cooperation Sustainability | Improvement and Operability of Cooperation Mechanism | __________ | __________ |
| 11 | Cooperation Sustainability | Subsequent Cooperation Intention and Potential for Deepening and Expansion | __________ | __________ |
| Score Summary | | Total Score (Sum of Scores of All Indicators) | __________ | - |
| Evaluation Grade | | (Excellent/Good/Satisfactory/Pass/Fail) | __________ | - |
| Overall Evaluation Opinion | | __________ | | |
| Evaluating Party's Seal/Signature | | __________ | Handler: __________ | Contact Phone: __________ |

**Table S9. Comprehensive Effect Evaluation Form of Cross-border Industry-Education Integration Teaching Practice System (Summary by Management Departments + Evaluation by Third-Party Transnational Education Experts)**

**Type of Evaluating Subject**: __________ (Please tick: Summary Evaluation by Management Departments □ Evaluation by Third-Party Transnational Education Experts □)

**Name of Evaluating Subject/Expert**: __________ Affiliated Unit/Institution: __________

**Project Group Corresponding to the Evaluated Cross-border Industry-Education Integration Teaching Practice System**: __________

System Implementation Period: __________ (Start Date - End Date)

**Evaluation Date**: __________

**Evaluation Instructions**:

1. This form is specially used for the comprehensive effect evaluation of the cross-border industry-education integration teaching practice system, including 16 evaluation indicators covering six dimensions: scientificity of system design, resource integration efficiency, teaching practice quality, cross-cultural adaptation, quality assurance, and effect output, with 3 newly added core indicators: "Cross-cultural Adaptation Support Effect", "Improvement Degree of Cross-border Quality Assurance System", and "Cross-border Employment Promotion Effect";
2. Scoring adopts a 100-point scale, with scoring criteria: 90-100 points (Excellent, Significant Comprehensive Effect), 80-89 points (Good, Good Comprehensive Effect), 70-79 points (Satisfactory, Qualified Comprehensive Effect), 60-69 points (Pass, Basically Qualified Comprehensive Effect), 0-59 points (Fail, Unqualified Comprehensive Effect);
3. Cronbach's α coefficient = 0.92, indicating excellent scale reliability;
4. The remarks column can be filled with supplementary information such as specific effect performance, typical supporting cases, and optimization suggestions;
5. The summary evaluation by management departments shall form an objective conclusion based on multi-dimensional actual operation data and feedback from all parties, and the evaluation by third-party transnational education experts shall put forward professional opinions combining international education industry standards and practical experience;
6. The evaluation results will serve as the core basis for system optimization and upgrading, project fund support, and promotion of cooperation models.

| **No.** | **Evaluation Dimension** | **Evaluation Indicator** | **Score (0-100 Points)** | **Remarks (Specific Effects/Supporting Cases/Optimization Suggestions)** |
| --- | --- | --- | --- | --- |
| 1 | Scientificity of System Design | Matching Degree between Cross-border Industry-Education Integration Goals and Regional/Industry Needs | __________ | __________ |
| 2 | Scientificity of System Design | Connection Degree between Teaching Practice Links and International Industry Standards | __________ | __________ |
| 3 | Scientificity of System Design | Rationality and Operability of System Operation Mechanism | __________ | __________ |
| 4 | Resource Integration Efficiency | Integration Efficiency of Cross-border Teachers, Scientific Research and Industrial Resources | __________ | __________ |
| 5 | Resource Integration Efficiency | Construction Quality of Cross-border Teaching Resources (Courses, Textbooks, etc.) | __________ | __________ |
| 6 | Resource Integration Efficiency | Construction Level and Utilization Efficiency of Cross-border Practice Bases | __________ | __________ |
| 7 | Teaching Practice Quality | Quality of Cross-border Course Teaching and Student Satisfaction | __________ | __________ |
| 8 | Teaching Practice Quality | Implementation Quality and Effect of Cross-border Practice Projects | __________ | __________ |
| 9 | Teaching Practice Quality | Effect of Improving Students' Cross-border Practice Capabilities | __________ | __________ |
| 10 | Cross-cultural Adaptation | **Cross-cultural Adaptation Support Effect** (Newly Added) | __________ | __________ |
| 11 | Cross-cultural Adaptation | Training Effect of Teachers' and Students' Cross-cultural Communication and Collaboration Capabilities | __________ | __________ |
| 12 | Quality Assurance | **Improvement Degree of Cross-border Quality Assurance System** (Newly Added) | __________ | __________ |
| 13 | Quality Assurance | Effectiveness of Teaching Practice Process Monitoring and Evaluation | __________ | __________ |
| 14 | Effect Output | **Cross-border Employment Promotion Effect** (Newly Added) | __________ | __________ |
| 15 | Effect Output | Output Level of Cooperative Scientific Research Achievements (Papers, Patents, etc.) | __________ | __________ |
| 16 | Effect Output | Demonstration and Leading Role and Promotion Value of the System | __________ | __________ |
| Score Summary | | Total Score (Sum of Scores of All Indicators) | __________ | - |
| Evaluation Grade | | (Excellent/Good/Satisfactory/Pass/Fail) | __________ | - |
| Comprehensive Evaluation Opinion | | __________ | | |
| Evaluating Subject's Seal/Signature | | __________ | Handler/Contact Information | __________ |
